# Supplementary material
Source: PubMed Central journal article supplement (PMC4224519)
Supplement: mp500164r_si_001.pdf [file mp500164r_si_001.pdf]

## Supporting Information

### Methods and Materials

#### General

Chemicals were purchased from Sigma Aldrich (St. Louis, MO) except when indicated. *p*-Benzylisothiocyanato-desferrioxamine was obtained from Macrocyclics, Inc. (Dallas, Texas). Chemicals were used without further manipulations unless stated. Metal-free ultrapure water (>18.2 MΩ·cm, Milli-Q, Millipore, Billerica, MA) was obtained by soaking in Chelex 100 resin (Bio-Rad Laboratories, Hercules, CA) overnight at a ratio of 5g resin per 100 ml water as indicated in the manufacturer's instructions. For dose calibration measurements, a Capintec CRC-55tR (Capintec, Ramsey NJ) calibrated for Zr-89 was utilized (Calibration # 465). Quantification of radioactivity in counts-per-minute (cpm) was obtained through a Perkin Elmer Wizard<sup>2</sup> 2480 automatic gamma counter with an energy window of 800-1000 keV normalized for Zr-89 (909 keV). Radiochemical purity and yields were determined via a Bioscan AR-2000 radioTLC plate reader equipped with Winscan version 3.13 software. Silica-gel impregnated glass-fiber instant thin-layer chromatography paper (ITLC-SG, Varian Inc.) was used for ITLC analysis with 50 mM DTPA, pH 7 as the mobile phase. Vivaspin 500 centrifugal filters with a 10 kDa MWCO was obtained from GE Healthcare (Amersham, UK).

#### <sup>89</sup>Zr Radiolabeling

The production of Zr-89 was made by a proton irradiation of a solid yttrium foil target on an EBCO TR19/9 variable beam energy cyclotron (EbcO Industries Inc., British Columbia, Canada) using methods published previously.<sup>(1)</sup> After end-of-bombardment, Zr-89 was isolated from the target by passing through a column of hydroxamate modified resin essentially capturing the isotope of interest. Elution was done by washing the column with 1 M oxalic acid resulting in a >99.99% radionuclidic and radiochemical purity and an effective specific activity of 195-497 MBq/μg (5.28-13.4 mCi/μg).<sup>(1, 2)</sup> Typical radiolabeling conditions involve the following protocols. A solution of <sup>89</sup>Zr-oxalate (~1 mCi) was added into a 1.5 ml vial containing 100 μL metal-free water. The pH was adjusted to ~ 7.0-7.2 with 1 M Na<sub>2</sub>CO<sub>3</sub>. Effervescence was observed as the neutralization process resulted in CO<sub>2</sub> evolution. After the desired pH was obtained, 125-140 μg (Mb-DFO: 1.56-1.75 nmol; Cys-Db-DFO: 2.5 – 2.8 nmol) minibody/diabody-DFO was added. The reaction was incubated at room temperature with intermittent mild shaking. After 1-1.5 h, the reaction was quenched with approximately 50 μL of 50 mM DTPA (pH~7). Crude radiolabeling yields were determined to be >95% using iTLC with the Zr-89 labeled proteins remaining close to the origin (*R<sub>f</sub>*=0.30) while the free Zr-89 is found near the solvent front (*R<sub>f</sub>*=0.65). Purification of <sup>89</sup>Zr-protein was performed using a PD10 size exclusion column with saline as eluent and further concentrated with Vivaspin 500(MWCO: 10 kDa) centrifugal filter. The final radiochemical purity was >99% based on iTLC analysis.

#### SDS Gel Electrophoresis

20 μg of each sample was diluted in 20 μl of saline and mixed in a 1:1 ratio with Tris-Glycine SDS Sample Buffer (Invitrogen). After boiling at 95° C for 10 minutes, the samples were run on a 4-20% Tris-Glycine Gel (Invitrogen) with Tris-Glycine SDS Running Buffer (Invitrogen) at 150 V for 45 minutes. The gel was washed with 100 mL of ultrapure water for 15 minutes, then developed using Simple Blue Sage Stain (Invitrogen) for 1 hour and washed over night with 100 mL of ultrapure water (**SI Fig. 1**).

**Supplemental Table 1. Biodistribution of <sup>89</sup>Zr-Mb administered via lateral tail vein in male athymic nude mice bearing PSMA(+) LNCaP prostate xenografts.**

| Tissue               | 1 h                | 4 h                 | 12 h                | 24 h                |
|----------------------|--------------------|---------------------|---------------------|---------------------|
|                      | n=4                | n=4                 | n=4                 | n=3                 |
| Blood                | 14.21 ± 2.52       | 6.64 ± 2.62         | 3.34 ± 0.71         | 1.99 ± 0.73         |
| Tumor                | 2.29 ± 0.49        | 4.71 ± 0.98         | 6.12 ± 2.03         | 12.12 ± 3.61        |
| Heart                | 4.50 ± 0.86        | 2.48 ± 0.78         | 2.13 ± 0.53         | 1.57 ± 0.45         |
| Lungs                | 4.25 ± 1.76        | 2.36 ± 1.33         | 1.78 ± 0.80         | 1.98 ± 1.10         |
| Liver                | 2.26 ± 0.72        | 1.47 ± 0.68         | 2.74 ± 0.40         | 5.06 ± 2.57         |
| Spleen               | 1.52 ± 0.35        | 1.33 ± 0.66         | 1.47 ± 0.18         | 1.77 ± 0.96         |
| Stomach              | 0.24 ± 0.10        | 0.17 ± 0.09         | 0.39 ± 0.26         | 0.73 ± 1.14         |
| Sm. Intestines       | 1.39 ± 0.62        | 0.50 ± 0.23         | 0.48 ± 0.08         | 0.54 ± 0.21         |
| L. Intestines        | 0.10 ± 0.03        | 0.78 ± 0.20         | 1.36 ± 0.62         | 0.53 ± 0.31         |
| Kidney               | 6.98 ± 1.74        | 6.58 ± 1.54         | 6.29 ± 0.94         | 10.67 ± 4.42        |
| Bone                 | 3.78 ± 1.10        | 3.39 ± 0.59         | 2.77 ± 0.69         | 1.55 ± 0.17         |
| Muscle               | 0.45 ± 0.10        | 0.39 ± 0.17         | 0.30 ± 0.04         | 0.43 ± 0.20         |
| <i>Tumor/Blood</i>   | <i>0.17 ± 0.06</i> | <i>0.81 ± 0.36</i>  | <i>1.75 ± 0.33</i>  | <i>5.93 ± 1.97</i>  |
| <i>Tumor/Liver</i>   | <i>1.05 ± 0.28</i> | <i>2.63 ± 0.09</i>  | <i>1.88 ± 0.58</i>  | <i>1.89 ± 0.20</i>  |
| <i>Tumor/Kidneys</i> | <i>0.35 ± 0.13</i> | <i>0.65 ± 0.04</i>  | <i>0.80 ± 0.35</i>  | <i>0.90 ± 0.21</i>  |
| <i>Tumor/Muscle</i>  | <i>6.13 ± 0.53</i> | <i>11.35 ± 3.86</i> | <i>19.37 ± 5.48</i> | <i>26.81 ± 7.94</i> |

**Supplemental Table 2. Biodistribution of <sup>89</sup>Zr-Mb administered via lateral tail vein in male athymic nude mice bearing PSMA(-) PC3 prostate xenografts.**

| Tissue               | 1 h                | 4 h                 | 12 h               | 24 h                |
|----------------------|--------------------|---------------------|--------------------|---------------------|
|                      | n=4                | n=4                 | n=4                | n=4                 |
| Blood                | 13.98 ± 1.46       | 6.94 ± 0.98         | 2.76 ± 0.44        | 1.14 ± 0.26         |
| Tumor                | 2.28 ± 0.40        | 2.10 ± 0.34         | 1.67 ± 0.52        | 2.36 ± 0.31         |
| Heart                | 3.95 ± 0.96        | 2.40 ± 0.24         | 1.66 ± 0.26        | 1.40 ± 0.43         |
| Lungs                | 6.23 ± 2.22        | 1.72 ± 0.47         | 1.39 ± 0.60        | 1.32 ± 0.81         |
| Liver                | 2.83 ± 1.16        | 1.78 ± 0.22         | 3.21 ± 1.31        | 3.07 ± 1.71         |
| Spleen               | 2.24 ± 0.78        | 1.18 ± 0.24         | 1.69 ± 0.79        | 1.22 ± 0.27         |
| Stomach              | 0.32 ± 0.05        | 0.47 ± 0.28         | 0.44 ± 0.14        | 0.08 ± 0.03         |
| Sm. Intestines       | 1.60 ± 1.01        | 0.80 ± 0.43         | 0.39 ± 0.13        | 0.31 ± 0.14         |
| L. Intestines        | 0.39 ± 0.31        | 0.99 ± 0.14         | 1.51 ± 1.58        | 0.24 ± 0.09         |
| Kidney               | 8.18 ± 3.11        | 4.83 ± 0.96         | 3.59 ± 2.14        | 7.96 ± 4.46         |
| Bone                 | 2.81 ± 0.26        | 1.60 ± 0.39         | 1.45 ± 0.83        | 1.31 ± 0.63         |
| Muscle               | 0.42 ± 0.12        | 0.21 ± 0.04         | 0.42 ± 0.29        | 0.13 ± 0.03         |
| <i>Tumor/Blood</i>   | <i>0.16 ± 0.01</i> | <i>0.30 ± 0.01</i>  | <i>0.61 ± 0.20</i> | <i>2.13 ± 0.35</i>  |
| <i>Tumor/Liver</i>   | <i>0.81 ± 0.38</i> | <i>1.12 ± 0.09</i>  | <i>0.54 ± 0.12</i> | <i>0.96 ± 0.46</i>  |
| <i>Tumor/Kidneys</i> | <i>0.28 ± 0.13</i> | <i>0.44 ± 0.35</i>  | <i>0.46 ± 0.24</i> | <i>0.36 ± 0.17</i>  |
| <i>Tumor/Muscle</i>  | <i>5.68 ± 1.46</i> | <i>11.86 ± 3.49</i> | <i>7.31 ± 3.24</i> | <i>18.10 ± 2.56</i> |

**Supplemental Table 3. Competitive binding with 200 µg and 500 µg non-radioactive Mb and huJ591.**

| Tissue         | 12 h p.i.<br>(200 µg Mb) | 12 h p.i.<br>(500 µg Mb) | 24 h p.i.<br>(500 µg huJ591) |
|----------------|--------------------------|--------------------------|------------------------------|
|                | n=6                      | n=4                      | n=4                          |
| Blood          | 4.08 ± 0.99              | 3.66 ± 0.68              | 2.76 ± 1.18                  |
| Tumor          | 3.73 ± 1.27              | 3.82 ± 0.70              | 4.98 ± 2.38                  |
| Heart          | 1.94 ± 0.55              | 2.06 ± 0.48              | 2.17 ± 0.58                  |
| Lungs          | 2.42 ± 0.98              | 1.22 ± 0.29              | 1.75 ± 0.93                  |
| Liver          | 4.24 ± 1.84              | 3.43 ± 1.21              | 3.49 ± 2.02                  |
| Spleen         | 1.60 ± 0.63              | 1.47 ± 0.65              | 2.08 ± 1.06                  |
| Stomach        | 0.34 ± 0.18              | 0.24 ± 0.12              | 0.32 ± 0.15                  |
| Sm. Intestines | 0.52 ± 0.17              | 0.50 ± 0.23              | 0.45 ± 0.26                  |
| L. Intestines  | 0.47 ± 0.14              | 0.51 ± 0.23              | 0.95 ± 0.91                  |
| Kidney         | 9.60 ± 5.14              | 16.72 ± 6.14             | 8.61 ± 4.77                  |
| Bone           | 1.37 ± 0.81              | 2.98 ± 0.69              | 2.84 ± 1.46                  |
| Muscle         | 0.36 ± 0.23              | 0.36 ± 0.06              | 0.44 ± 0.14                  |

**Supplemental Table 4. Biodistribution of <sup>89</sup>Zr-Cys-Db administered via lateral tail vein in male athymic nude mice bearing PSMA(+) LNCaP prostate xenografts.**

| Tissue               | 1 h                | 4 h                 | 12 h                | 24 h                | 12 h Block   |
|----------------------|--------------------|---------------------|---------------------|---------------------|--------------|
|                      | n=4                | n=4                 | n=5                 | n=4                 | n=4          |
| Blood                | 15.40 ± 4.23       | 4.44 ± 0.55         | 1.71 ± 0.43         | 0.59 ± 0.08         | 1.59 ± 0.18  |
| Tumor                | 4.08 ± 1.00        | 6.91 ± 2.94         | 12.26 ± 2.54        | 6.53 ± 0.98         | 5.64 ± 1.75  |
| Heart                | 5.50 ± 1.03        | 3.42 ± 0.95         | 2.61 ± 0.52         | 1.79 ± 0.06         | 2.81 ± 0.20  |
| Lungs                | 7.35 ± 1.95        | 3.13 ± 1.17         | 1.97 ± 0.58         | 0.93 ± 0.24         | 1.23 ± 0.10  |
| Liver                | 8.61 ± 0.80        | 5.40 ± 2.10         | 5.70 ± 2.79         | 5.54 ± 1.65         | 5.96 ± 1.69  |
| Spleen               | 2.63 ± 0.40        | 2.54 ± 1.02         | 2.50 ± 1.57         | 1.75 ± 0.62         | 1.94 ± 0.83  |
| Stomach              | 0.37 ± 0.03        | 0.59 ± 0.39         | 0.80 ± 0.38         | 0.59 ± 0.19         | 0.92 ± 0.40  |
| Sm. Intestines       | 2.90 ± 1.06        | 1.26 ± 0.36         | 0.95 ± 0.38         | 0.74 ± 0.08         | 0.95 ± 0.27  |
| L. Intestines        | 0.47 ± 0.22        | 1.57 ± 0.69         | 1.21 ± 0.40         | 0.77 ± 0.33         | 1.03 ± 0.33  |
| Kidney               | 13.26 ± 5.92       | 16.86 ± 4.43        | 13.77 ± 1.94        | 15.47 ± 8.09        | 13.36 ± 1.79 |
| Bone                 | 4.48 ± 1.82        | 4.25 ± 1.54         | 3.69 ± 0.63         | 1.57 ± 0.52         | 5.09 ± 2.95  |
| Muscle               | 0.72 ± 0.17        | 0.68 ± 0.18         | 0.47 ± 0.09         | 0.43 ± 0.12         | 0.44 ± 0.09  |
| <i>Tumor/Blood</i>   | <i>0.27 ± 0.03</i> | <i>1.24 ± 0.12</i>  | <i>4.93 ± 0.89</i>  | <i>11.19 ± 2.16</i> |              |
| <i>Tumor/Liver</i>   | <i>0.53 ± 0.08</i> | <i>1.25 ± 0.18</i>  | <i>0.82 ± 0.18</i>  | <i>1.23 ± 0.27</i>  |              |
| <i>Tumor/Kidneys</i> | <i>0.46 ± 0.17</i> | <i>0.50 ± 0.08</i>  | <i>0.84 ± 0.23</i>  | <i>0.53 ± 0.30</i>  |              |
| <i>Tumor/Muscle</i>  | <i>4.90 ± 0.87</i> | <i>10.08 ± 2.31</i> | <i>15.55 ± 3.49</i> | <i>12.86 ± 1.72</i> |              |

**Supplemental Table 5. Biodistribution of <sup>89</sup>Zr-Cys-Db administered via lateral tail vein in male athymic nude mice bearing PSMA(-) PC3 prostate xenografts.**

| Tissue               | 1 h                | 4 h                | 12 h               | 24 h                |
|----------------------|--------------------|--------------------|--------------------|---------------------|
|                      | n=5                | n=4                | n=5                | n=4                 |
| Blood                | 10.39 ± 2.19       | 3.50 ± 0.41        | 0.96 ± 0.12        | 0.39 ± 0.12         |
| Tumor                | 2.36 ± 0.48        | 3.64 ± 1.53        | 2.75 ± 0.51        | 3.44 ± 0.85         |
| Heart                | 3.52 ± 0.98        | 2.98 ± 0.38        | 2.51 ± 0.26        | 2.10 ± 0.53         |
| Lungs                | 5.14 ± 1.80        | 1.44 ± 0.11        | 1.15 ± 0.65        | 1.19 ± 0.47         |
| Liver                | 5.05 ± 3.60        | 4.53 ± 1.32        | 5.39 ± 2.81        | 2.70 ± 0.37         |
| Spleen               | 2.19 ± 1.10        | 1.72 ± 0.52        | 1.20 ± 0.36        | 0.93 ± 0.23         |
| Stomach              | 0.52 ± 0.17        | 0.54 ± 0.24        | 0.77 ± 0.33        | 0.18 ± 0.09         |
| Sm. Intestines       | 1.38 ± 0.50        | 0.94 ± 0.26        | 0.55 ± 0.23        | 0.40 ± 0.13         |
| L. Intestines        | 1.15 ± 0.44        | 0.76 ± 0.13        | 0.92 ± 0.31        | 0.45 ± 0.09         |
| Kidney               | 7.29 ± 2.61        | 12.74 ± 5.63       | 9.13 ± 2.68        | 9.10 ± 1.35         |
| Bone                 | 3.36 ± 0.80        | 3.60 ± 0.51        | 2.51 ± 1.70        | 1.81 ± 0.66         |
| Muscle               | 0.82 ± 0.51        | 0.73 ± 0.25        | 0.54 ± 0.24        | 0.29 ± 0.05         |
| <i>Tumor/Blood</i>   | <i>0.24 ± 0.08</i> | <i>1.01 ± 0.34</i> | <i>2.87 ± 0.43</i> | <i>9.18 ± 1.76</i>  |
| <i>Tumor/Liver</i>   | <i>0.67 ± 0.44</i> | <i>0.89 ± 0.53</i> | <i>0.63 ± 0.31</i> | <i>1.06 ± 0.52</i>  |
| <i>Tumor/Kidneys</i> | <i>0.36 ± 0.16</i> | <i>0.34 ± 0.21</i> | <i>0.32 ± 0.10</i> | <i>0.39 ± 0.15</i>  |
| <i>Tumor/Muscle</i>  | <i>3.62 ± 1.77</i> | <i>5.28 ± 2.19</i> | <i>5.68 ± 1.86</i> | <i>12.53 ± 5.08</i> |

**SI Table 6. Tumor uptake expressed as %ID/g (mean  $\pm$  S.D.) of all three radiotracers obtained from VOIs.**

| <b>Time, h</b> | <b><math>^{89}\text{Zr-Mb}</math></b> | <b><math>^{89}\text{Zr-Cys-Db}</math></b> | <b><math>^{89}\text{Zr-huJ591}</math></b> |
|----------------|---------------------------------------|-------------------------------------------|-------------------------------------------|
| 1              | 3.23 $\pm$ 0.96                       | 5.58 $\pm$ 1.09                           | 2.94 $\pm$ 0.66                           |
| 4              | 6.16 $\pm$ 1.43                       | 8.19 $\pm$ 1.41                           | 10.21 $\pm$ 1.95                          |
| 12             | 6.85 $\pm$ 0.87                       | 9.84 $\pm$ 2.54                           | 15.84 $\pm$ 1.79                          |
| 24             | 7.93 $\pm$ 0.67                       | 9.17 $\pm$ 1.48                           | 26.57 $\pm$ 3.50                          |

**SI Table 7. Blood clearance of all three radiotracers obtained from heart VOIs expressed as %ID/g (mean  $\pm$  S.D.).**

| <b>Time, h</b> | <b><sup>89</sup>Zr-Mb</b> | <b><sup>89</sup>Zr-Cys-Db</b> | <b><sup>89</sup>Zr-huJ591</b> |
|----------------|---------------------------|-------------------------------|-------------------------------|
| 1              | 20.86 $\pm$ 3.39          | 13.19 $\pm$ 2.70              | 25.49 $\pm$ 2.11              |
| 4              | 13.90 $\pm$ 3.06          | 5.90 $\pm$ 1.10               | 21.66 $\pm$ 1.91              |
| 12             | 5.06 $\pm$ 2.84           | 2.74 $\pm$ 0.61               | 16.36 $\pm$ 1.57              |
| 24             | 3.26 $\pm$ 1.20           | 2.00 $\pm$ 0.18               | 12.13 $\pm$ 1.26              |



**SI Table 8. Comparison of tumor-to-muscle ratios of all radiotracers.**

| <b>Time, h</b> | <b><sup>89</sup>Zr-Mb</b> | <b><sup>89</sup>Zr-Cys-Db</b> | <b><sup>89</sup>Zr-huJ591</b> |
|----------------|---------------------------|-------------------------------|-------------------------------|
| 1              | 2.53 ± 0.34               | 3.48 ± 0.48                   | 2.92 ± 0.21                   |
| 4              | 4.90 ± 0.96               | 5.17 ± 1.09                   | 6.69 ± 1.79                   |
| 12             | 10.04 ± 3.70              | 6.09 ± 0.85                   | 7.87 ± 1.63                   |
| 24             | 9.59 ± 3.68               | 6.89 ± 1.15                   | 11.02 ± 2.30                  |

**SI Table 9. Comparison of tumor-to-blood (heart) ratios of all radiotracers.**

| <b>Time, h</b> | <b><sup>89</sup>Zr-Mb</b> | <b><sup>89</sup>Zr-Cys-Db</b> | <b><sup>89</sup>Zr-huJ591</b> |
|----------------|---------------------------|-------------------------------|-------------------------------|
| 1              | 0.15 ± 0.03               | 0.43 ± 0.09                   | 0.12 ± 0.02                   |
| 4              | 0.41 ± 0.02               | 1.40 ± 0.22                   | 0.47 ± 0.09                   |
| 12             | 1.67 ± 0.81               | 3.58 ± 0.19                   | 0.98 ± 0.19                   |
| 24             | 2.65 ± 0.90               | 4.91 ± 0.26                   | 2.22 ± 0.46                   |

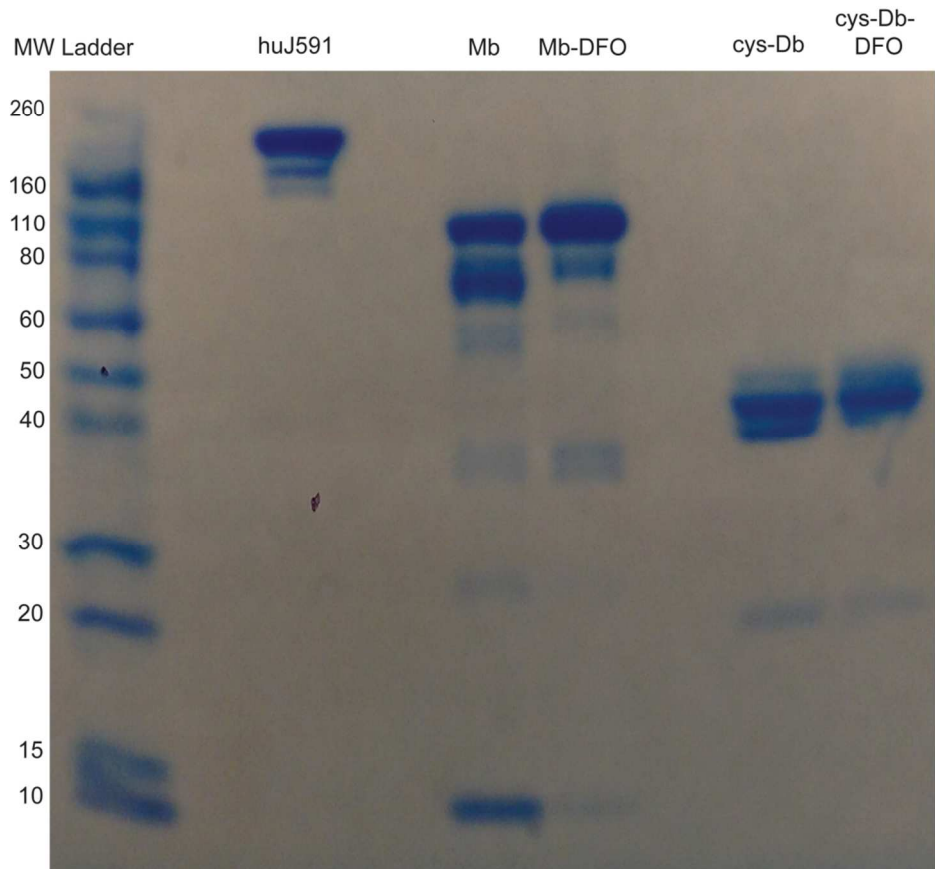

**SI Figure 1. SDS PAGE gel electrophoresis of huJ591, DFO-derivatized and unmodified Mb and Cys-Db.**

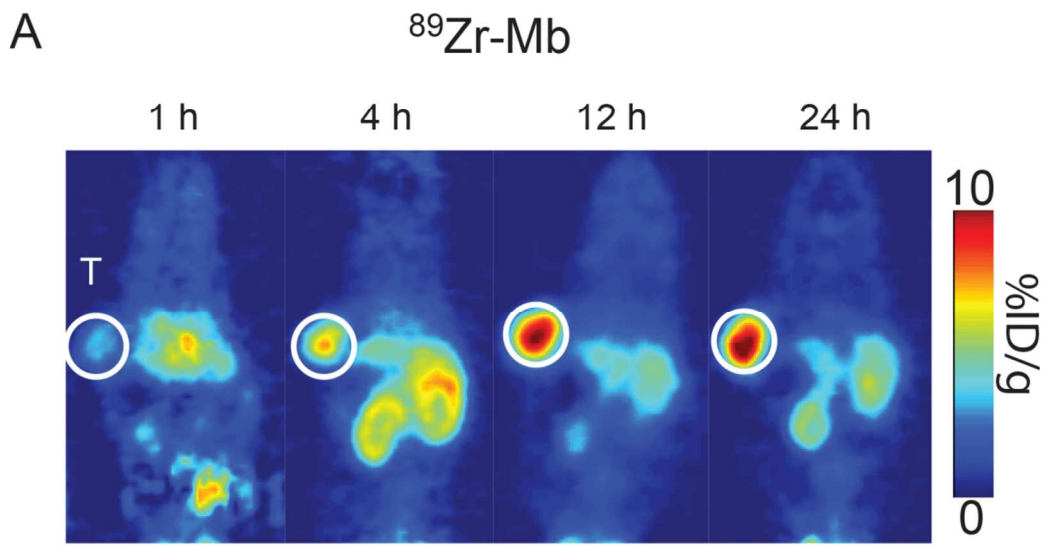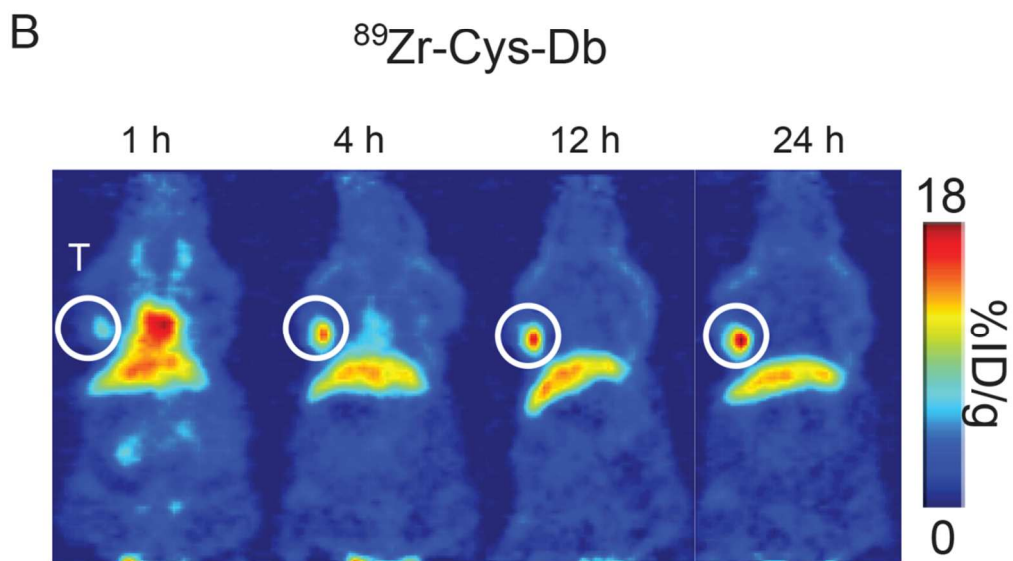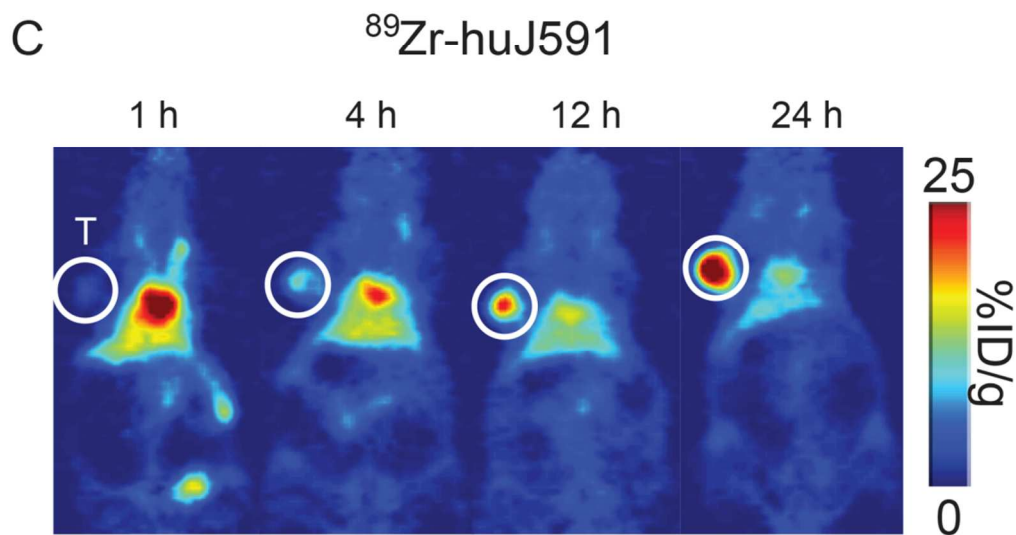

SI Figure 2. Planar sections of serial PET images obtained with  $^{89}\text{Zr-Mb}$  (A),  $^{89}\text{Zr-Cys-Db}$  (B) and  $^{89}\text{Zr-huJ591}$  from 1-24 h post-injection.

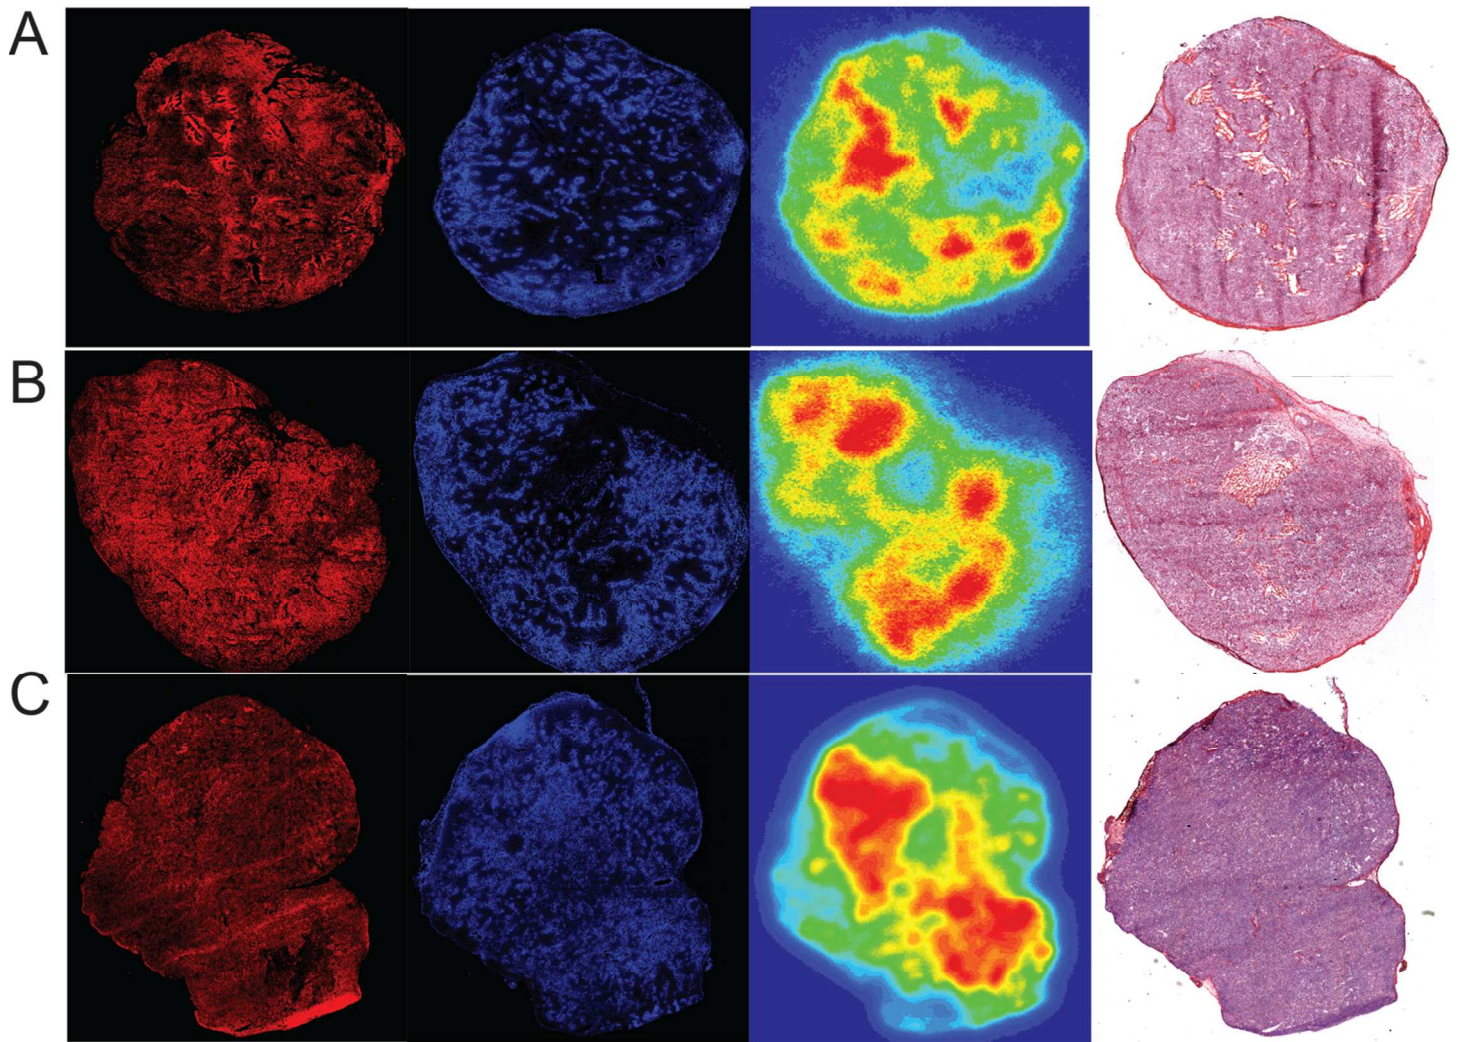

SI Figure 3. Autoradiography and Histology. Hoechst 33342 (blue), PSMA staining (red), autoradiographs and H&E stain of (A)  $^{89}\text{Zr}$ -Mb and (B)  $^{89}\text{Zr}$ -Cys-Db and (C)  $^{89}\text{Zr}$ -huJ591.

#### References:

1. Holland JP, Sheh Y, Lewis JS. Standardized methods for the production of high specific-activity zirconium-89. *Nucl Med Biol.* Oct 2009;36(7):729-739.
2. Verel I, Visser GW, Boellaard R, Stigter-van Walsum M, Snow GB, van Dongen GA.  $^{89}\text{Zr}$  immuno-PET: comprehensive procedures for the production of  $^{89}\text{Zr}$ -labeled monoclonal antibodies. *J Nucl Med.* Aug 2003;44(8):1271-1281.
